# Supplementary material for: Physiologically‐Based Pharmacokinetic Modeling of Atorvastatin Incorporating Delayed Gastric Emptying and Acid‐to‐Lactone Conversion
Source: PubMed Central journal article supplement — CPT Pharmacometrics Syst Pharmacol. 2019 Aug 1;8(9):664–75. doi: 10.1002/psp4.12447 (PMC6765700; doi:10.1002/psp4.12447), 2019-08-01
Supplement: PSP4-8-664-s001.pdf [file PSP4-8-664-s001.pdf]

**A**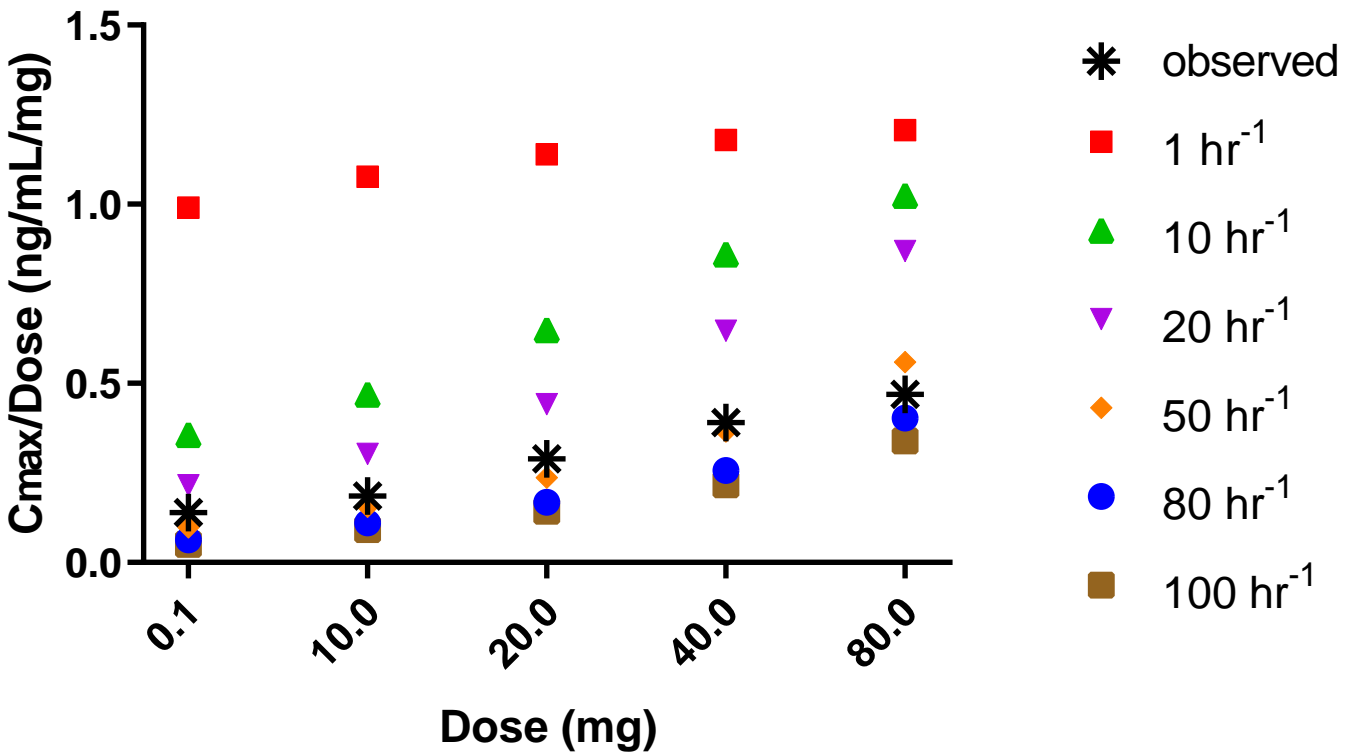**B**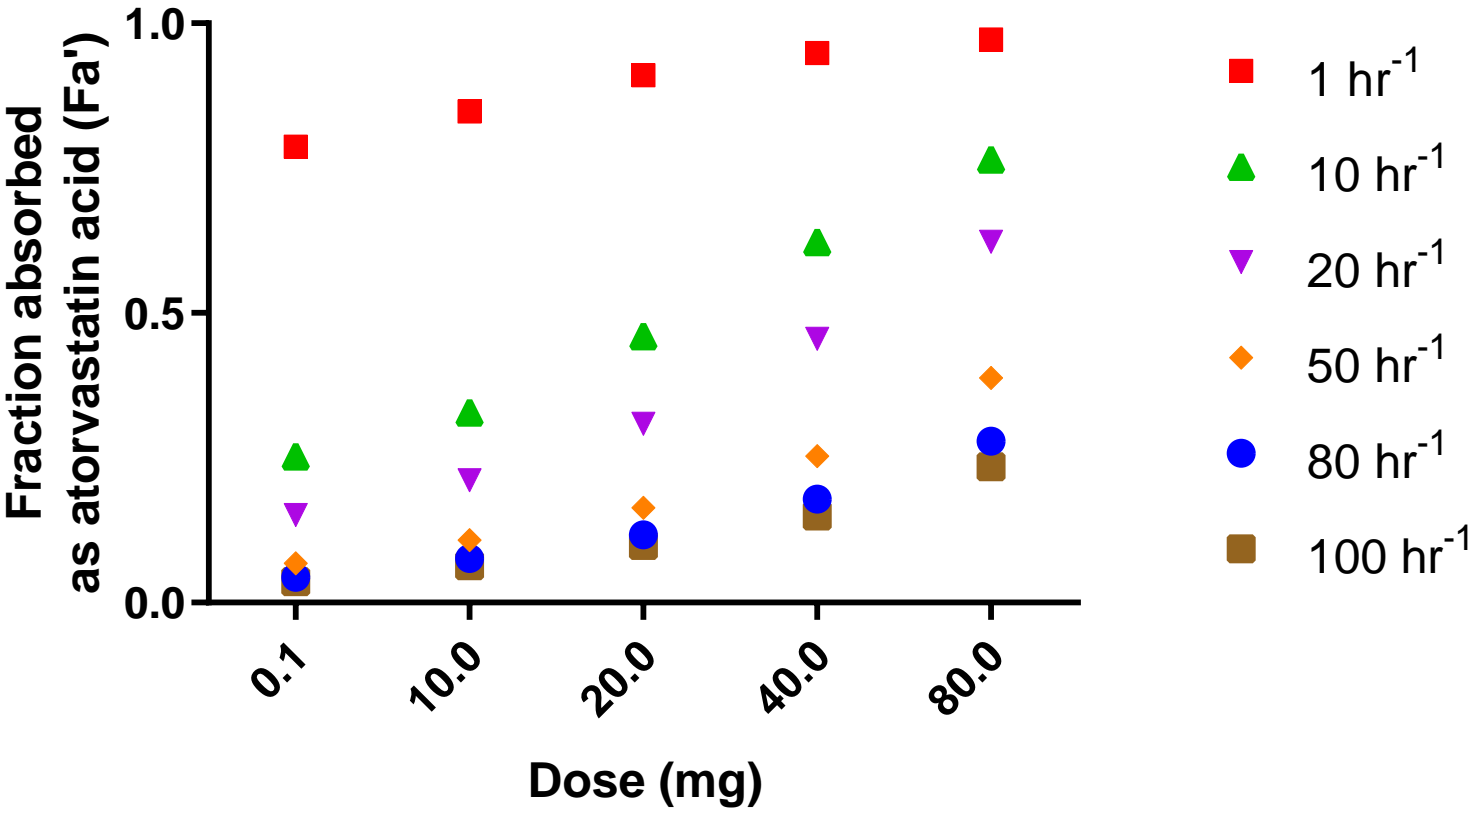

Figure S1. Sensitivity analysis on the effect of stomach degradation/lactone conversion on A) atorvastatin acid Cmax and B) fraction absorbed as atorvastatin acid (Fa'). Degradation rate constant included in the model is 50 hr<sup>-1</sup>. Sensitivity analysis was performed with a population representative.
