# Supplementary material for: Physiologically‐Based Pharmacokinetic Modeling of Atorvastatin Incorporating Delayed Gastric Emptying and Acid‐to‐Lactone Conversion
Source: PubMed Central journal article supplement — CPT Pharmacometrics Syst Pharmacol. 2019 Aug 1;8(9):664–75. doi: 10.1002/psp4.12447 (PMC6765700; doi:10.1002/psp4.12447), 2019-08-01
Supplement: PSP4-8-664-s004.pdf [file PSP4-8-664-s004.pdf]

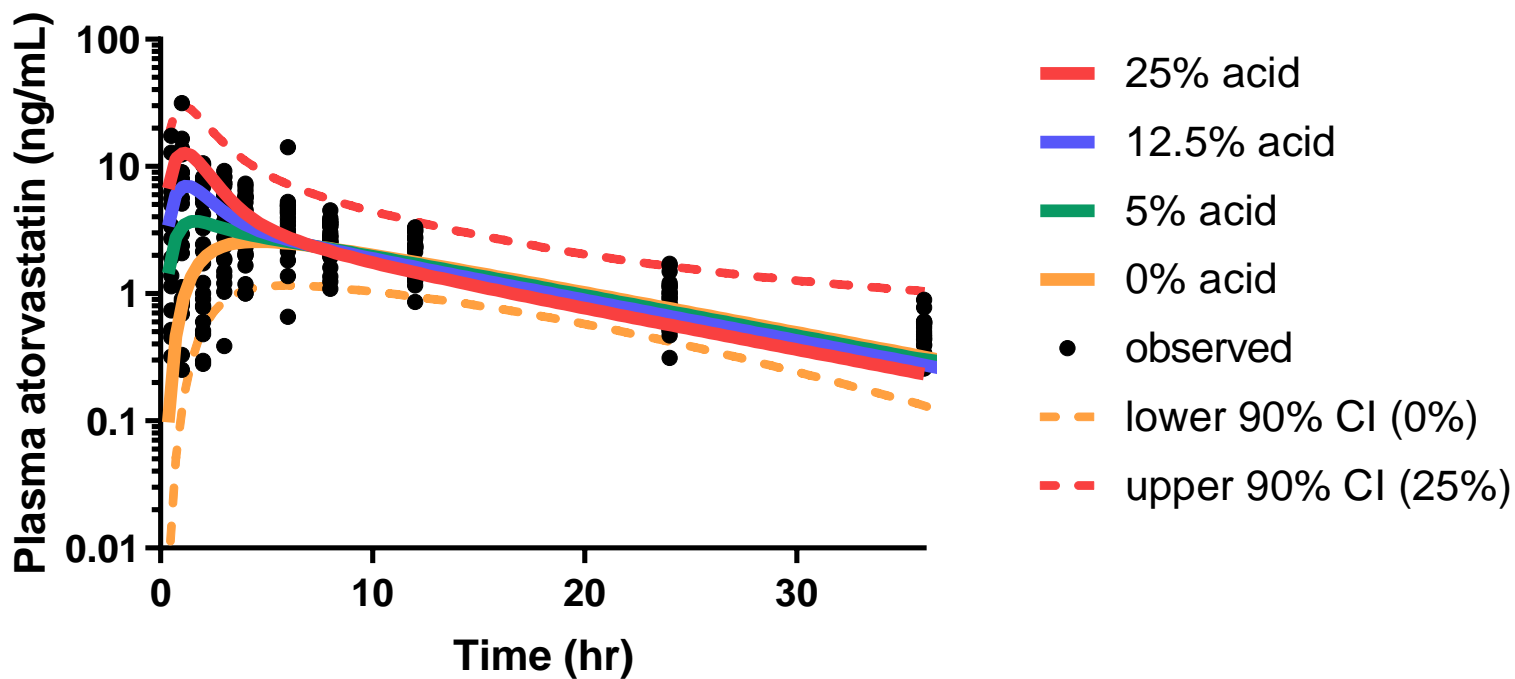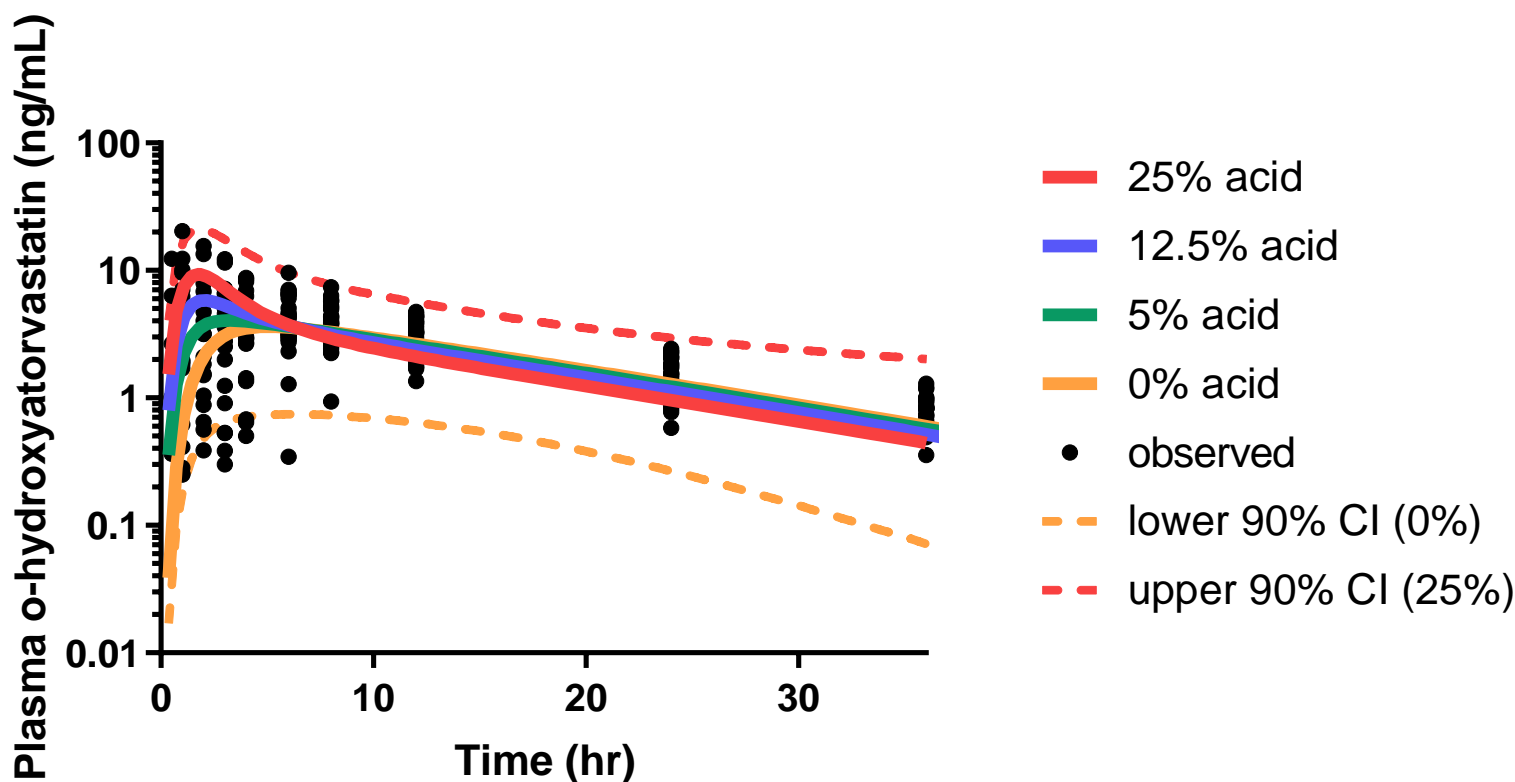

Figure S4. Sensitivity analysis around the fraction of atorvastatin absorbed as acid ( $F_a'$ ). Black symbols are observed data for atorvastatin in the presence of 1.5 mg dulaglutide. Solid lines represent predicted geometric mean concentration profiles and dotted lines 90% confidence intervals (CIs). In these simulations the stomach mean residence time was fixed at 0.84 hr, 3-fold of the default Simcyp value. Sensitivity analysis was performed with healthy volunteer population.
