# Supplementary material for: Physiologically‐Based Pharmacokinetic Modeling of Atorvastatin Incorporating Delayed Gastric Emptying and Acid‐to‐Lactone Conversion
Source: PubMed Central journal article supplement — CPT Pharmacometrics Syst Pharmacol. 2019 Aug 1;8(9):664–75. doi: 10.1002/psp4.12447 (PMC6765700; doi:10.1002/psp4.12447), 2019-08-01
Supplement: PSP4-8-664-s005.pdf [file PSP4-8-664-s005.pdf]

Table S1. SV-Rifampicin-SD Inputs

| Parameter                                                  | Value               | Method/Reference     |
|------------------------------------------------------------|---------------------|----------------------|
| Molecular weight (g/mol)                                   | 823                 |                      |
| log P                                                      | 4.01                |                      |
| Compound type                                              | Ampholyte           |                      |
| pKa                                                        | 1.7, 7.9            |                      |
| B/P                                                        | 0.9                 |                      |
| fu                                                         | 0.116               |                      |
| Main plasma binding protein                                | Human serum albumin |                      |
|                                                            |                     |                      |
| fu <sub>gut</sub>                                          | 1                   |                      |
| P <sub>eff,man</sub> (10 <sup>-4</sup> cm/s)               | 2.15                | Predicted            |
| Permeability Assay                                         | Caco-2              |                      |
| Apical pH : Basolateral pH                                 | 6.4 : 7.4           |                      |
| Activity                                                   | Passive & Active    |                      |
| P <sub>appaA:B</sub> (10 <sup>-6</sup> cm/s)               | 50                  |                      |
| Reference Compound                                         | Propranolol         |                      |
| Reference Compound Value (10 <sup>-6</sup> cm/s)           | 21.15               |                      |
| Scalar                                                     | 1                   |                      |
|                                                            |                     |                      |
|                                                            |                     |                      |
| Distribution Model                                         | Full PBPK Model     |                      |
| V <sub>SS</sub> (L/kg)                                     | 0.42                | Predicted - Method 2 |
|                                                            |                     |                      |
| CL <sub>int</sub> (HLM)<br>(μL/min/mg protein)             | 2.84                |                      |
| CL <sub>int</sub> (Bile)<br>(μL/min/10 <sup>6</sup> cells) | 0.288               |                      |
|                                                            |                     |                      |
| CL <sub>R</sub> (L/h)                                      | 1.26                |                      |
|                                                            |                     |                      |
| Permeability limited liver model                           |                     |                      |
| CL <sub>PD</sub><br>(μL/min/10 <sup>6</sup> cells)         | 1E-05               |                      |
| fu <sub>IW</sub>                                           | 0.043716            |                      |
| fu <sub>EW</sub>                                           | 1                   | Predicted            |
|                                                            |                     |                      |

|                            |                   |  |
|----------------------------|-------------------|--|
| Transporter                | SLCO1B1 (OATP1B1) |  |
| $J_{\max}$ (pmol/min/pmol) | 4                 |  |
| $K_m$ ( $\mu\text{M}$ )    | 0.5               |  |
|                            |                   |  |
| Enzyme                     | CYP2C8            |  |
| $K_I$ ( $\mu\text{M}$ )    | 24.5              |  |
|                            |                   |  |
| Enzyme                     | CYP3A4            |  |
| $K_I$ ( $\mu\text{M}$ )    | 15                |  |
|                            |                   |  |
| Transporter                | ABCB1 (P-gp/MDR1) |  |
| Organ                      | Gut               |  |
| $K_I$ ( $\mu\text{M}$ )    | 23.8              |  |
|                            |                   |  |
| Transporter                | ABCG2 (BCRP)      |  |
| Organ                      | Gut               |  |
| $K_I$ ( $\mu\text{M}$ )    | 2                 |  |
|                            |                   |  |
| Transporter                | SLCO1B1 (OATP1B1) |  |
| Organ                      | Liver             |  |
| $K_I$ ( $\mu\text{M}$ )    | 0.067             |  |
|                            |                   |  |
| Transporter                | SLCO1B3 (OATP1B3) |  |
| Organ                      | Liver             |  |
| $K_I$ ( $\mu\text{M}$ )    | 0.07              |  |
|                            |                   |  |
| Transporter                | SLCO2B1 (OATP2B1) |  |
| Organ                      | Liver             |  |
| $K_I$ ( $\mu\text{M}$ )    | 11.4              |  |
|                            |                   |  |
| Transporter                | ABCB1 (P-gp/MDR1) |  |
| Organ                      | Liver             |  |
| $K_I$ ( $\mu\text{M}$ )    | 23.8              |  |
|                            |                   |  |
| Transporter                | ABCG2 (BCRP)      |  |
| Organ                      | Liver             |  |
| $K_I$ ( $\mu\text{M}$ )    | 2                 |  |
